# Supplementary material for: Opinions on hypertension care and therapy adherence at the healthcare provider and healthcare system level: a qualitative study in the Hague, Netherlands
Source: HighWire-hosted journal article supplement (doi:10.1136/bmjopen-2022-062128), 2022-07-01
Supplement: bmjopen-2022-062128supp001_data_supplement.pdf [file bmjopen-2022-062128supp001_data_supplement.pdf]

**Appendix 1. Topic list for monodisciplinary focus groups**

1. Introduction of all participants
2. Exploration: how does each participant relate to the topic 'improvement of hypertension care'?
3. Exploration: invitation to write down ideals concerning hypertension care
4. Group discussion of described ideals
5. Which barriers concerning achievement of these ideals are perceived?
6. How could these barriers be solved?

**Appendix 2. Topic list for additional focus group**

1. What are your motives for being involved with improvement of hypertension care?
2. What are your expectations in terms of outcomes when hypertension care would be improved?
3. When would you consider improvement of hypertension care as successful? What are your ambitions?
4. To which extent would you need other healthcare professionals in order to achieve positive outcomes? And is this affected by local elements?
5. What do you expect of your colleagues and other health care professionals to make this project successful?
